# Supplementary material for: AFSM sequencing approach: a simple and rapid method for genome-wide SNP and methylation site discovery and genetic mapping
Source: PubMed Central journal article supplement — Sci Rep. 2014 Dec 3;4:7300. doi: 10.1038/srep07300 (PMC4252907; doi:10.1038/srep07300), 2014-12-03
Supplement: srep07300-s1.pdf [file srep07300-s1.pdf]

# AFSM sequencing approach: a simple and rapid method for genome-wide SNP and methylation site discovery and genetic mapping

Zhiqiang Xia, Meiling Zou, Shengkui Zhang, Binxiao Feng & Wenquan Wang

| <b>Supplementary File</b> | <b>Title</b>                                                                                                                  |
|---------------------------|-------------------------------------------------------------------------------------------------------------------------------|
| Supplementary Figure 1    | Distribution of reads across the 85 barcoded samples obtained from the cassava KS population that were sequenced in one lane. |
| Supplementary Figure 2    | Annotation of methylated genes (CDSMGs, GMGs, and PMGs).                                                                      |
| Supplementary Table 1     | The full list of barcode adapters for EcoRI used in the AFSM approach.                                                        |
| Supplementary Table 2     | Adapters and PCR primers used in the AFSM library preparation.                                                                |
| Supplementary Table 3     | High-throughput sequencing of AFSM tags by Illumina Hiseq 2500.                                                               |
| Supplementary Table 4     | Relative levels of cytosine methylation at the CCGG sites in cassava KS population.                                           |
| Supplementary Table 5     | AFSM markers (including SNPs, indels, and methylated sites) obtained in the cassava population.                               |
| Supplementary Table 6     | Methylation patterns in the SC12 and, KU50 parents and their F1 progenies.                                                    |
| Supplementary Table 7     | Comparison of six high-throughput polymorphism detection approaches.                                                          |
| Supplementary Protocol    | Detailed protocol describing AFSM sample preparation.                                                                         |

Supplementary Figure 1 Distribution of reads across the 85 barcoded samples obtained from the cassava KS population that were sequenced in one lane.

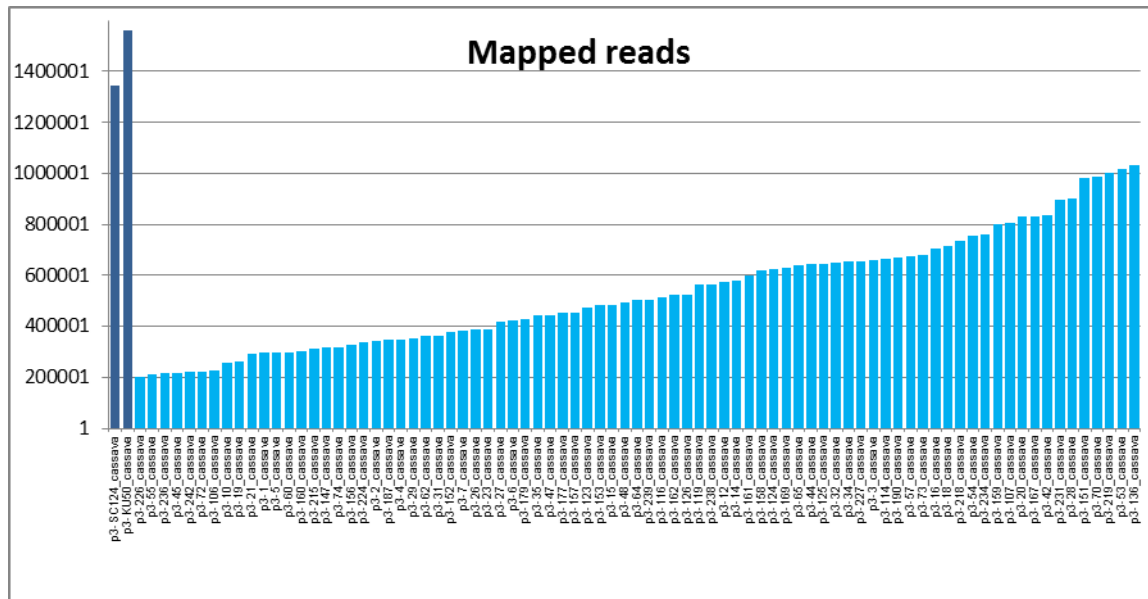

Supplementary Figure 2 Annotation of methylated genes (CDSMGs, GMGs, and PMGs).

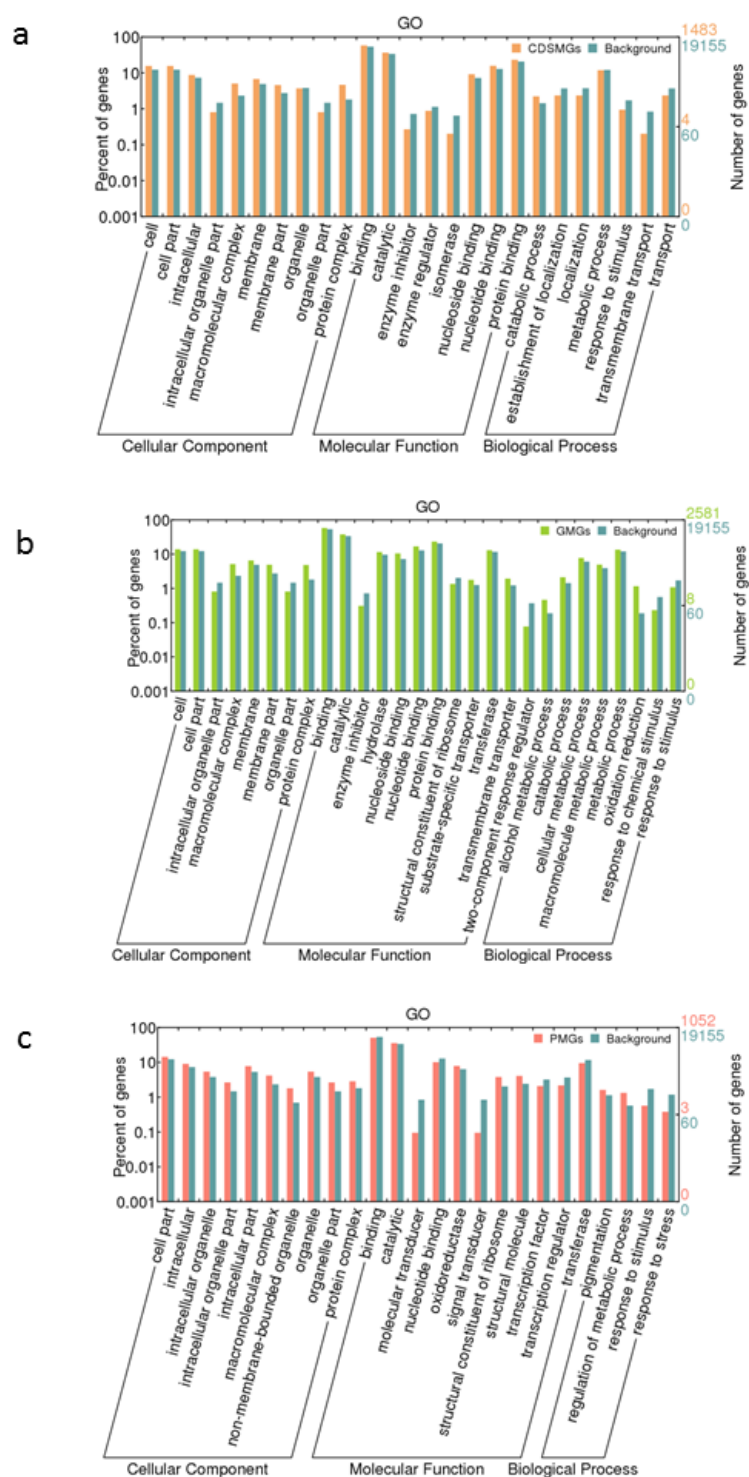

Annotation of methylated genes: CDSMGs (a), GMGs (b), PMGs (c) with BGI WEGO<sup>[31]</sup>. Of the 19,155 genes with GO annotations, 1483 CDSMGs, 2581 GMGs and 1052 PMGs showed significant enrichment differences ( $P < 0.05$ ,  $\chi^2$  test) compared with total analysed cassava genes.

Annotations are grouped by cellular component, molecular function or biological process based on the JGI cassava gene GO annotation information. Gene numbers and percentages (on a log scale) are listed for each category.

Supplementary Table 1 The full list of 96 developed barcode adapters for EcoRI in AFSM approach.

| No. | Barcode Adapter Sequence |
|-----|--------------------------|-----|--------------------------|-----|--------------------------|-----|--------------------------|-----|--------------------------|-----|--------------------------|
| 1   | TGGCT                    | 17  | CGCGT                    | 33  | GCGGA                    | 49  | TAACA                    | 65  | AAGCG                    | 81  | CTTAT                    |
| 2   | GAGAT                    | 18  | TCACA                    | 34  | CAATA                    | 50  | TCTCT                    | 66  | CGCCG                    | 82  | GTAGA                    |
| 3   | GCCTT                    | 19  | CCGCA                    | 35  | TCTGA                    | 51  | ACCTG                    | 67  | GGATA                    | 83  | CCTCG                    |
| 4   | CAGCT                    | 20  | CATGG                    | 36  | ACTAA                    | 52  | CGGTG                    | 68  | TGTAG                    | 84  | GAACT                    |
| 5   | TGCTT                    | 21  | TAGTT                    | 37  | GGCAT                    | 53  | GATTA                    | 69  | TCCAA                    | 85  | TTACT                    |
| 6   | ATAGG                    | 22  | CTCTA                    | 38  | CTACA                    | 54  | GCACT                    | 70  | TCATT                    | 86  | ATCCG                    |
| 7   | TGTTG                    | 23  | TCCGT                    | 39  | TACCT                    | 55  | ACTGG                    | 71  | TATCA                    | 87  | CGTCA                    |
| 8   | CTTAG                    | 24  | TATGT                    | 40  | TCGCG                    | 56  | ATTCA                    | 72  | GGAGG                    | 88  | CAGAA                    |
| 9   | GTCGT                    | 25  | TCGTA                    | 41  | CTCAT                    | 57  | TGAGA                    | 73  | CACCA                    | 89  | ACAGT                    |
| 10  | AATGA                    | 26  | GAATT                    | 42  | TTCCA                    | 58  | GGCCA                    | 74  | TGCGG                    | 90  | GGTTG                    |
| 11  | AACTT                    | 27  | ACCGA                    | 43  | ATATT                    | 59  | GTGTT                    | 75  | ATGCT                    | 91  | GCTAT                    |
| 12  | CTCGG                    | 28  | ACACG                    | 44  | GCGAG                    | 60  | CCATG                    | 76  | GTTCT                    | 92  | ATGTG                    |
| 13  | TGTGT                    | 29  | GCTCA                    | 45  | TTCTG                    | 61  | CCTTA                    | 77  | ATCAA                    | 93  | GTGCG                    |
| 14  | GTAAG                    | 30  | CTTGA                    | 46  | GAGTG                    | 62  | TTGAA                    | 78  | CCGAT                    | 94  | TGAAT                    |
| 15  | ACGTT                    | 31  | TAGAG                    | 47  | CATAT                    | 63  | TGCAA                    | 79  | AATTG                    | 95  | CAAGT                    |
| 16  | AATCT                    | 32  | ATTAT                    | 48  | GTAA                     | 64  | TCCAG                    | 80  | AAGCA                    | 96  | GGTGT                    |

A total of 85 barcode adapters (No. 1-85) were used in this study.

Supplementary Table 2 Adapters and PCR primers used in AFSM library preparation.

| Name                        | Sequence (5'to3')                                                    |
|-----------------------------|----------------------------------------------------------------------|
| Adaptor Type                |                                                                      |
| “barcode” adapter           | TAGCTCGTAGACACCGTCAG[barcode]G<br>AATTC[barcode]CTGACGGTGTCTACGAGCTA |
| “HpaII-methylation” adapter | CGGTGAGATGAGGCATGAC<br>GTCATGCCTCATCTCAC                             |
| “MspI-methylation” adapter  | CGGACTAATGAGGCATGAC<br>GTCATGCCTCATTAGTC                             |
| Primer Name                 |                                                                      |
| AFSM primer EcoRI_all       | TAGCTCGTAGACACCGTCAG                                                 |
| AFSM primer HpaII           | GTCATGCCTCATCTCACCGG                                                 |
| AFSM primer MspI            | GTCATGCCTCATTAGTCCGG                                                 |

Supplementary Table 3 High-throughput sequencing of AFSM tags by Illumina Hiseq 2500.

|                                                                  | Number      | Mapping efficiency<br>(% HQ reads) |
|------------------------------------------------------------------|-------------|------------------------------------|
| Raw reads                                                        | 113,472,592 | /                                  |
| HQ reads                                                         | 99,446,059  | /                                  |
| The highest HQ reads in one sample                               | 3,164,835   | /                                  |
| The lowest HQ reads in one sample                                | 428,131     | /                                  |
| The average HQ reads per sample                                  | 1,169,954   | /                                  |
| <sup>a</sup> CV in HQ reads                                      | 45.33%      | /                                  |
| HQ reads with “HpaII-methylation” adapter and HpaII cut-site     | 50,780,017  | /                                  |
| HQ reads with “MspI-methylation” adapter and MspI cut-site       | 48,457,678  | /                                  |
| Mapped reads                                                     | 48,253,199  | 48.52%                             |
| The highest mapped reads in one sample                           | 1,561,416   | 49.34%                             |
| The lowest mapped reads in one sample                            | 201,558     | 47.08%                             |
| The average mapped reads per sample                              | 567,685     | 48.52%                             |
| <sup>a</sup> CV in mapped reads                                  | 44.44%      | /                                  |
| Mapped reads with “HpaII-methylation” adapter and HpaII cut-site | 25,055,929  | 49.34%                             |
| Mapped reads with “MspI-methylation” adapter and MspI cut-site   | 24,179,781  | 49.90%                             |

<sup>a</sup> CV: The coefficient of variation

Supplementary Table 4 Relative levels of cytosine methylation at the CCGG sites in cassava KS population.

| KS population | Methylated CCGG sites |                       |                        |
|---------------|-----------------------|-----------------------|------------------------|
|               | Total                 | Hemi-methylated sites | Fully methylated sites |
| All           | 13598                 | 9193 (67.61%)         | 4405 (32.39%)          |
| Promoter      | 1354 (9.96%)          | 658 (7.16%)           | 696 (15.80%)           |
| Gene          | 2937 (21.60%)         | 1092 (11.88%)         | 1845 (41.88%)          |
| CDS           | 1661 (12.22%)         | 561 (6.10%)           | 1100 (24.97%)          |

Supplementary Table 5 AFSM markers (including SNP, indel, and methylated sites) obtained in cassava population.

|          | Total   | SNP     | Indel  | Methylated<br>Site <sup>a</sup> | AFSM Marker |        |          |
|----------|---------|---------|--------|---------------------------------|-------------|--------|----------|
|          |         |         |        |                                 | Gene        | CDS    | Promoter |
| All      | 316,276 | 278,737 | 23,941 | 13,598                          | 113,907     | 49,831 | 48,058   |
| Filtered | 15,176  | 10,685  | 3,246  | 1,245                           | 5,566       | 2,621  | 2,685    |

<sup>a</sup> Hemi-methylated or full methylated sites > 2/3.



Supplementary Table 6 Methylation patterns in the SC12 and, KU50 parents and their F1 progenies.

| Pattern | SC124            |                  | KU50             |                  | F1               |                  | Number of sites |
|---------|------------------|------------------|------------------|------------------|------------------|------------------|-----------------|
|         | Hemi-methylation | Full methylation | Hemi-methylation | Full methylation | Hemi-methylation | Full methylation |                 |
| A1      | +                | -                | +                | -                | +                | -                | 534             |
| A2      | -                | +                | -                | +                | -                | +                | 182             |
| B1      | +                | -                | -                | +                | +                | -                | 0               |
| B2      | +                | -                | -                | +                | -                | +                | 0               |
| B3      | -                | +                | +                | -                | +                | -                | 0               |
| B4      | -                | +                | +                | -                | -                | +                | 0               |
| C1      | +                | -                | +                | -                | -                | +                | 0               |
| C2      | -                | +                | -                | +                | +                | -                | 0               |
| D1      | +                | -                | +                | -                | +                | +                | 333             |
| D2      | -                | +                | -                | +                | +                | +                | 197             |
| D3      | +                | -                | -                | +                | +                | +                | 1148            |
| D4      | -                | +                | +                | -                | +                | +                | 890             |

Supplementary Table 7 Comparison of six high-throughput polymorphism detection approaches.

|                                                   | 2b-RAD <sup>22</sup>        | RAD <sup>19</sup>                                  | GBS <sup>20</sup>                                            | RSTA <sup>32</sup>                                                     | SFP <sup>33</sup>                       | AFSM                                             |
|---------------------------------------------------|-----------------------------|----------------------------------------------------|--------------------------------------------------------------|------------------------------------------------------------------------|-----------------------------------------|--------------------------------------------------|
| Methylation site detection                        | No                          | No                                                 | No                                                           | No                                                                     | No                                      | Yes                                              |
| Fully methylated site detection                   | No                          | No                                                 | No                                                           | No                                                                     | No                                      | Yes                                              |
| Hemi-methylated site detection                    | No                          | No                                                 | No                                                           | No                                                                     | No                                      | Yes                                              |
| Number of cytosine methylated site surveyed       | /                           | /                                                  | /                                                            | /                                                                      | /                                       | 13,598                                           |
| Number of cytosine fully methylated site surveyed | /                           | /                                                  | /                                                            | /                                                                      | /                                       | 4,405                                            |
| Number of cytosine hemi-methylated site surveyed  | /                           | /                                                  | /                                                            | /                                                                      | /                                       | 9,193                                            |
| Marker type                                       | 33~36bp Sequence data: SNPs | Sequence data: SNPs next to restriction cut sites  | Sequence data: SNPs and indels next to restriction cut sites | Restriction cut site polymorphism sites: distinguishes SNPs and indels | SNP and indels                          | Sequence data: SNPs, indels and methylated sites |
| High quality reads                                | 11,829,959                  | 41,622                                             | 102,505,713                                                  | 50,935                                                                 | 92,924                                  | 99,446,059                                       |
| Read length (bp)                                  | 33~36 <sup>b</sup>          | 26 <sup>b</sup>                                    | 86 <sup>b</sup>                                              | 50 <sup>b</sup>                                                        | 25 <sup>b</sup>                         | 2X132 <sup>a</sup>                               |
| The coefficient of variation (CV)                 | Not mentioned               | Not mentioned                                      | 43%                                                          | Not mentioned                                                          | Not mentioned                           | 45.33%                                           |
| Number of polymorphisms identified                | 5,051,475                   | Approximately 13,000                               | Not mentioned                                                | 12,431                                                                 | 3,806                                   | 48,253,199                                       |
| Informative marker rate                           | 42.7%                       | 31%                                                | Not mentioned                                                | 24%                                                                    | 4% at a 5% false discovery rate cut off | 48.52%                                           |
| Prior information required                        | Not necessary               | EST or genome sequence to map short sequence reads | Not necessary                                                | EST, 454 or genome sequence                                            | EST, 454 or genome sequence             | Not necessary                                    |

|                                                      |                                            |                                            |                                            |                                                     |                                                                    |                                            |
|------------------------------------------------------|--------------------------------------------|--------------------------------------------|--------------------------------------------|-----------------------------------------------------|--------------------------------------------------------------------|--------------------------------------------|
| Polymorphism identification                          | Custom Perl scripts for sequence alignment | Custom Perl scripts for sequence alignment | Custom Perl scripts for sequence alignment | Genotype clusters across study individuals          | Hybridization signal difference among study individuals            | Custom Perl scripts for sequence alignment |
| Individual genotype data                             | Not mentioned                              | Not mentioned                              | Not mentioned                              | Yes                                                 | No                                                                 | Yes                                        |
| Organisms studied                                    | <i>Arabidopsis</i>                         | <i>Neurospora</i>                          | Barley                                     | Purple sea urchin                                   | Yeast, <i>Arabidopsis</i> , <i>Anopheles</i> , several seed plants | Cassava                                    |
| Sequencing platform                                  | Illumina sequencing                        | Illumina sequencing                        | Illumina HiSeq2000                         | Custom high-density oligonucleotide array (Agilent) | Custom high-density oligonucleotide array (Affymetrix)             | Illumina HiSeq2500                         |
| Sonication                                           | Not required                               | Yes                                        | Not required                               | \                                                   | \                                                                  | Not required                               |
| de novo analysis without sequenced genome still work | No                                         | No                                         | Yes                                        | No                                                  | No                                                                 | Yes                                        |

<sup>a</sup> Paired-end read sequencing

<sup>b</sup> Single-end read sequencing

Supplementary Protocol. Detailed protocol describing AFSM sample preparation.

The protocol can be adopted for detection of genome-wide SNPs, indels and cytosine methylations (including full methylations and hemi-methylations) in 85 samples in a simple and easy way.

The collected samples should be fresh and in the same organization part, and the growth conditions and the growth period should be consistent. Long-term preservation samples to liquid nitrogen or below -70°C refrigerator.

High quality DNA is required for AFSM. DNA need be quantified using NANODROP 2000C spectrophotometer instrument and DNA concentration were normalized to 100ng/μL. Note-before processing a new set of samples, digested and non-digested total DNA need to run an agarose gel, to test whether DNA extraction are of sufficient quality for library construction. As control, non-digested sample should look identical to the original DNA after 8 hours at 37°C, while the digested samples should be clearly degraded.

Three types of adapters were designed: Barcodes Adapter, HpaII-Methylation Adapter and MspI-Methylation Adapter. Besides, two primer pairs were designed for PCR.

Combined two restriction enzyme pairs (EcoRI-MspI and EcoRI-HpaII) are used in this protocol.

#### Digest DNA

1、 In two 85 well plates set up each of the 2 reactions in each well plate. A reaction mix is in a total volume of 20μL as follows. Tap to mix. Spin briefly in tabletop centrifuge. Incubate at 37 °C for 8 hours.

| Reagent                | Volume (μL) |
|------------------------|-------------|
| Genomic DNA (100ng/μL) | 2.0         |
| NEBuffer 4 (10x)       | 2.0         |
| EcoRI (20U/μL)         | 0.5         |
| MspI (20U/μL)          | 0.5         |
| dH <sub>2</sub> O      | 15.0        |
| <b>Total</b>           | <b>20.0</b> |

| Reagent                | Volume (μL) |
|------------------------|-------------|
| Genomic DNA (100ng/μL) | 2.0         |
| NEBuffer 1 (10x)       | 2.0         |
| EcoRI (20U/μL)         | 0.5         |
| HpaII (10U/μL)         | 1.0         |
| dH <sub>2</sub> O      | 14.5        |
| <b>Total</b>           | <b>20.0</b> |

2、 Inactive the enzyme at 65°C for 30 min. Hold samples to ice.

3、 For each sample, load 8μL digested DNA on an agarose gel alongside a comparable amount of

intact DNA from the same sample as control.

#### Double stranded adaptors preparation

Combine the two oligonucleotides for each adaptor (Adaptor\_1 and Adaptor\_2). Standard, unmodified oligos were ordered in complimentary pairs and annealed in a high-salt solution to form the double-stranded adapter prior to use. The adapter were annealed by heating to 95°C and then slowly cooling to 30°C at a rate of -1°C/minute by programming a single step PCR cycle at 95°C for 1 minute and then decreasing the temperature by 1°C each cycle for 65 cycles. After ligation, the adapters were adjusted to a uniform concentration of 1.0µM each.

#### AFSM

| Type                        | Adapter_1 (5'to3')                 | Adapter_2 (5'to3')                     |
|-----------------------------|------------------------------------|----------------------------------------|
| “Barcode” Adapter           | TAGCTCGTAGACACC<br>GTCAG[barcode]G | AATTC[barcode]CTGACG<br>GTGTCTACGAGCTA |
| “MspI-Methylation” Adapter  | CGGACTAATGAGGC<br>ATGAC            | GTCATGCCTCATTAGTC                      |
| “HpaII-Methylation” Adapter | CGGTGAGATGAGGC<br>ATGAC            | GTCATGCCTCATCTCAC                      |

#### Ligation

1、 In two 85 well plates set up each of the 2 reactions in each well plate. A reaction mix is in a total volume of 20µL as follows. Tap to mix. Spin briefly in tabletop centrifuge. Incubate at 16°C over night.

| Reagent                          | Volume (µL) |
|----------------------------------|-------------|
| Digested DNA                     | 10.0        |
| T4 ligase buffer (10x)           | 2.0         |
| 1.0µM “Barcodes” Adapter         | 1.5         |
| 1.0µM “MspI-Methylation” Adapter | 1.5         |
| NEB T4 DNA ligase (200 U/µL)     | 0.5         |
| dH <sub>2</sub> O                | 4.5         |
| <b>Total</b>                     | <b>20.0</b> |

| Reagent                           | Volume (µL) |
|-----------------------------------|-------------|
| Digested DNA                      | 10.0        |
| T4 ligase buffer (10x)            | 2.0         |
| 1.0µM “Barcodes” Adapter          | 1.5         |
| 1.0µM “HpaII-Methylation” Adapter | 1.5         |
| NEB T4 DNA ligase (200 U/µL)      | 0.5         |
| dH <sub>2</sub> O                 | 4.5         |
| <b>Total</b>                      | <b>20.0</b> |

- 2、 Inactive the enzyme at 65°C for 20 min. Hold samples to ice.

#### Clean-up and Multiplexing

- 1、 EcoRI-HpaII ligated samples were pooled and clean-up using E.Z.N.A. Cycle-pure Kit (Omega Bio-tek, Inc., US, D6492), then elute in 50µL elution buffer in one tube .
- 2、 EcoRI-MspI ligated samples were pooled and clean-up, then elute in 50µL elution buffer in another tube.

#### PCR Amplification

- 1、 Prepare the following master mix:

| <b>Reagent</b>              | <b>Volume (µL)</b> |
|-----------------------------|--------------------|
| DNA from previous step      | 10.0               |
| NEB 2x Taq Master Mix       | 25.0               |
| AFSM primer EcoRI_all (5µM) | 4.0                |
| AFSM primer HpaII (5µM)     | 4.0                |
| dH <sub>2</sub> O           | 7.0                |
| <b>Total</b>                | <b>50.0</b>        |

| <b>Reagent</b>              | <b>Volume (µL)</b> |
|-----------------------------|--------------------|
| DNA from previous step      | 10.0               |
| NEB 2x Taq Master Mix       | 25.0               |
| AFSM primer EcoRI_all (5µM) | 4.0                |
| AFSM primer MspI (5µM)      | 4.0                |
| dH <sub>2</sub> O           | 7.0                |
| <b>Total</b>                | <b>50.0</b>        |

- 2、 Amplify using the following PCR cycling protocol:

- a、 30 seconds at 95°C
- b、 23 cycles of:
  - 30 seconds at 95°C
  - 30 seconds at 55°C
  - 30 seconds at 68°C
- c、 5 minutes at 72°C
- d、 Hold at 16°C

- 3、 Load these PCR products on a 2% agarose gel.

#### PCR product purification and size select

Purified the PCR product and receive the products with the size 250 to 500bp using the E.Z.N.A. Gel Extraction Kit (Omega Bio-tek, Inc., US, D2500-1).

After EcoRI-MspI 85-plex library and EcoRI-HpaII 85-plex library had been constructed, equal amount of the two libraries were combined into one 85-plex library.
